# Supplementary material for: Estimation of electrochemical cell potentials and reaction energies using Fermi energies
Source: Royal Society of Chemistry journal article supplement (doi:10.1039/d1cp04800g), 2021-11-22
Supplement: d1cp04800g1.pdf [file d1cp04800g1.pdf]

## Supporting Information

### Estimation of electrochemical cell potentials and reaction energies using Fermi energies

Amir Haghipour, Mohammad Mahdi Kalantarian\*

#### Methodology Details

Inside the non-overlapping spheres of muffin tin radius ( $R_{MT}$ ) around each atom, linear combination of radial solution of the Schrödinger equation times the spherical harmonic are used and the plane wave basis set is used in the interstitial region. To expand the wave functions in the interstitial region a plane wave cut-off value of  $K_{max} \cdot R_{mt} = 7.0$  was used, where  $R_{mt}$  is the smallest atomic sphere radius in the unit cell and  $K_{max}$  is the magnitude of the largest K vector. The Fourier-expanded charge density was truncated at  $G_{max} = 12$  (Ryd)<sup>1/2</sup>. The maximum value of the angular momentum ( $l_{max}$ ) was set equal to 10 for the wave function expansion inside the atomic spheres.

Spheres of muffin tin radius ( $R_{MT}$ ) around each atom were dictated by structure for each material. In the case of  $Li_2FeSiO_4$ ,  $LiFePO_4$ ,  $LiCoO_2$ ,  $LiNi_{1/3}Co_{1/3}Mn_{1/3}O_2$  (NCM), and  $LiMn_2O_4$ ,  $R_{MT}$  values 1.76, 2.00, 2.00 and 2.02 a.u. were used for Li, Mn, Fe and Co, respectively, and 1.42 a.u. for Si, P and O atoms. For  $LiFeBO_3$ ,  $R_{MT}$  of Fe, Li, B and O atoms set at 2.00, 1.75, 1.28 and 1.28 a.u., respectively. In the case of  $LiFeSO_4F$ ,  $R_{MT}$  of Fe, Li, S, F and O atoms was equal to 1.96, 1.82, 1.35, 1.74 and 1.35 a.u., respectively. The electron and spin configuration of the atoms were software defaults and were: Li: [He] 2s<sup>1</sup>, B: [He] 2s<sup>2</sup> 2p<sup>1</sup>, O: [He] 2s<sup>2</sup> 2p<sup>4</sup>, F: [He] 2s<sup>2</sup> 2p<sup>5</sup>, Si: [Ne] 3s<sup>2</sup> 3p<sup>2</sup>, P: [Ne] 3s<sup>2</sup> 3p<sup>3</sup>, S: [Ne] 3s<sup>2</sup> 3p<sup>4</sup>,  $Mn_{up}$ : [Ar] 3d<sup>5</sup>(5↑, 0↓) 4s<sup>2</sup>(1↑, 1↓),  $Fe_{up}$ : [Ar] 3d<sup>6.5</sup>(4.5↑, 2↓) 4s<sup>1.5</sup>(1↑, 0.5↓) and  $Co_{up}$ : [Ar] 3d<sup>7</sup>(5↑, 2↓) 4s<sup>2</sup>(1↑, 1↓).
